# Supplementary material
Source: MDPI journal article supplement (https://www.mdpi.com/2073-4344/11/4/493)
Supplement: s1 [file s1]

# Electronic Supplementary Information:

## A Force Field for a Manganese-Vanadium Water Oxidation Catalyst: Redox Potentials in Solution as Showcase

Gustavo Cárdenas,<sup>1,†</sup> Philipp Marquetand,<sup>1,2</sup>  
Sebastian Mai,<sup>1,a)</sup> and Leticia González<sup>1,2,b)</sup>

<sup>1</sup> Institute of Theoretical Chemistry, Faculty of Chemistry, University of Vienna, Währinger  
Straße 17, 1090 Vienna, Austria.

<sup>2</sup> Vienna Research Platform on Accelerating Photoreaction Discovery, University of Vienna,  
Währinger Str. 17, 1090 Wien, Austria.

<sup>†</sup> Current Address: Chemistry Department, Universidad Autónoma de Madrid, Calle Francisco  
Tomás y Valiente, 7, 28049 Madrid, Spain.

a) sebastian.mai@univie.ac.at

b) leticia.gonzalez@univie.ac.at

### Contents

|                                                                                                  |           |
|--------------------------------------------------------------------------------------------------|-----------|
| <b>S1 Force field parameters</b>                                                                 | <b>2</b>  |
| S1.1 Bond parameters . . . . .                                                                   | 2         |
| S1.2 Angle parameters . . . . .                                                                  | 3         |
| S1.3 Dihedral parameters . . . . .                                                               | 5         |
| S1.4 Lennard-Jones parameters . . . . .                                                          | 10        |
| S1.5 Coulomb parameters . . . . .                                                                | 11        |
| <b>S2 Deviations of the MM MD from the reference QM/MM MD</b>                                    | <b>12</b> |
| <b>S3 Influence of point charge placement</b>                                                    | <b>13</b> |
| <b>S4 Solvent shell sampling</b>                                                                 | <b>14</b> |
| <b>S5 Effect of different MM and QM/MM potential energy surfaces on the vertical energy gaps</b> | <b>15</b> |

## S1 Force field parameters

### S1.1 Bond parameters

The energy is given according to this equation:

$$E_{\text{bonds}} = \sum_i^{n_{\text{bonds}}} K_{r,i} (r_i - r_{i,\text{eq}})^2 \quad (1)$$

with  $K_{r,i}$  in  $\text{kcal mol}^{-1} \text{\AA}^{-2}$  and  $r_{i,\text{eq}}$  in  $\text{\AA}$ . Table S1 lists all of these parameters, based on the definition of the atom types in Figure 1 in the main text.

The parameters in Table S1 were obtained by iterative and manual adjustment as described in the main manuscript in Section 3.4.

**Table S1:** List of all obtained parameters for bonds. Parameters  $K_{r,i}$  are in  $\text{kcal mol}^{-1} \text{\AA}^{-2}$  and  $r_{i,\text{eq}}$  in  $\text{\AA}$ .

| Atom 1 | Atom 2 | — $[\text{Mn}_4^{\text{IV}}]$ — |                   | — $[\text{Mn}^{\text{III}}\text{Mn}_3^{\text{IV}}]$ — |                   |
|--------|--------|---------------------------------|-------------------|-------------------------------------------------------|-------------------|
|        |        | $K_{r,i}$                       | $r_{i,\text{eq}}$ | $K_{r,i}$                                             | $r_{i,\text{eq}}$ |
| MA     | o      | 390.89                          | 1.974             | 272.15                                                | 2.025             |
| MA     | OE     | 484.89                          | 1.834             | 402.50                                                | 1.846             |
| MA     | OF     | 476.81                          | 1.830             | 326.25                                                | 1.857             |
| MA     | OJ     | 214.17                          | 1.997             | 342.36                                                | 1.918             |
| MA     | OK     | 354.70                          | 1.949             | 338.57                                                | 1.948             |
| MA     | OL     | 309.29                          | 1.944             | 300.53                                                | 1.963             |
| MB     | OK     | 430.13                          | 1.859             | 476.11                                                | 1.873             |
| MB     | OL     | 529.00                          | 1.866             | 501.68                                                | 1.852             |
| MB     | OM     | 422.90                          | 1.866             | 465.13                                                | 1.854             |
| MB     | ON     | 359.13                          | 1.961             | 307.96                                                | 2.003             |
| MB     | OO     | 288.80                          | 1.978             | 414.55                                                | 1.943             |
| MB     | OP     | 336.68                          | 1.978             | 320.98                                                | 2.013             |
| MC     | o      | 309.73                          | 1.972             | 180.98                                                | 2.211             |
| MC     | OD     | 501.96                          | 1.826             | 365.23                                                | 1.874             |
| MC     | OI     | 501.09                          | 1.826             | 491.52                                                | 1.871             |
| MC     | OJ     | 262.29                          | 1.986             | 105.87                                                | 2.295             |
| MC     | OL     | 410.56                          | 1.944             | 290.72                                                | 2.002             |
| MC     | OM     | 366.18                          | 1.963             | 263.25                                                | 1.990             |
| MD     | o      | 305.92                          | 1.971             | 244.44                                                | 2.026             |
| MD     | OG     | 509.52                          | 1.833             | 401.89                                                | 1.845             |
| MD     | OH     | 437.51                          | 1.823             | 514.28                                                | 1.847             |
| MD     | OJ     | 333.46                          | 1.982             | 111.49                                                | 1.943             |
| MD     | OK     | 466.53                          | 1.945             | 300.05                                                | 1.950             |
| MD     | OM     | 441.96                          | 1.945             | 273.58                                                | 1.982             |
| VA     | OA     | 3154.63                         | 1.605             | 1465.76                                               | 1.616             |
| VA     | OB     | 731.22                          | 1.787             | 706.66                                                | 1.781             |
| VA     | OR     | 731.22                          | 1.787             | 649.53                                                | 1.779             |
| VB     | OB     | 727.53                          | 1.812             | 698.35                                                | 1.822             |
| VB     | OC     | 3845.17                         | 1.611             | 852.44                                                | 1.622             |
| VB     | OD     | 609.25                          | 1.769             | 595.83                                                | 1.754             |
| VB     | OE     | 810.59                          | 1.767             | 553.47                                                | 1.766             |
| VB     | OH     | 703.17                          | 1.769             | 750.34                                                | 1.764             |
| VB     | OI     | 656.22                          | 1.772             | 665.24                                                | 1.753             |
| VC     | OF     | 703.69                          | 1.771             | 442.89                                                | 1.771             |
| VC     | OG     | 827.46                          | 1.762             | 607.14                                                | 1.770             |
| VC     | OQ     | 3845.17                         | 1.611             | 1158.56                                               | 1.618             |
| VC     | OR     | 727.53                          | 1.812             | 563.63                                                | 1.832             |
| c      | o      | 895.67                          | 1.288             | 1070.23                                               | 1.275             |
| c      | ON     | 781.31                          | 1.293             | 724.79                                                | 1.290             |
| c      | OO     | 771.11                          | 1.290             | 703.55                                                | 1.304             |
| c      | OP     | 956.53                          | 1.286             | 871.97                                                | 1.288             |

## S1.2 Angle parameters

The energy is given according to this equation:

$$E_{\text{angles}} = \sum_i^{n_{\text{angles}}} K_{\alpha,i} (\alpha_i - \alpha_{i,\text{eq}})^2 \quad (2)$$

with  $K_{\alpha,i}$  in  $\text{kcal mol}^{-1} \text{rad}^{-2}$  and  $\alpha_{i,\text{eq}}$  in degree. Table S2 lists all of these parameters, based on the definition of the atom types in Figure 1 in the main text.

The parameters in Table S2 were obtained by iterative and manual adjustment as described in the main manuscript in Section 3.4.

**Table S2:** List of all obtained parameters for angles. Parameters  $K_{\alpha,i}$  are in kcal mol<sup>-1</sup>rad<sup>-2</sup> and  $r_{i,\text{eq}}$  in degree.

| Atom 1 | Atom 2 | Atom 3 | $-\text{[Mn}_4^{\text{IV}}]-$ |                        | $-\text{[Mn}^{\text{III}}\text{Mn}_3^{\text{IV}}]-$ |                        | Atom 1 | Atom 2 | Atom 3 | $-\text{[Mn}_4^{\text{IV}}]-$ |                        | $-\text{[Mn}^{\text{III}}\text{Mn}_3^{\text{IV}}]-$ |                        |
|--------|--------|--------|-------------------------------|------------------------|-----------------------------------------------------|------------------------|--------|--------|--------|-------------------------------|------------------------|-----------------------------------------------------|------------------------|
|        |        |        | $K_{\alpha,i}$                | $\alpha_{i,\text{eq}}$ | $K_{\alpha,i}$                                      | $\alpha_{i,\text{eq}}$ |        |        |        | $K_{\alpha,i}$                | $\alpha_{i,\text{eq}}$ | $K_{\alpha,i}$                                      | $\alpha_{i,\text{eq}}$ |
| MA     | OJ     | MC     | 600                           | 96.43                  | 600                                                 | 94.024                 | OG     | MD     | o      | 200                           | 97.17                  | 200                                                 | 97.014                 |
| MA     | OJ     | MD     | 600                           | 96.95                  | 600                                                 | 99.215                 | OH     | MD     | o      | 200                           | 97.80                  | 200                                                 | 96.936                 |
| MC     | OJ     | MD     | 600                           | 96.47                  | 600                                                 | 93.590                 | OG     | MD     | OH     | 200                           | 95.71                  | 200                                                 | 96.166                 |
| MA     | OK     | MB     | 600                           | 96.34                  | 600                                                 | 95.312                 | OJ     | MD     | o      | 200                           | 164.20                 | 200                                                 | 164.407                |
| MA     | OK     | MD     | 600                           | 99.82                  | 600                                                 | 97.940                 | OJ     | MD     | OG     | 200                           | 92.35                  | 200                                                 | 90.116                 |
| MB     | OK     | MD     | 600                           | 95.33                  | 600                                                 | 95.711                 | OJ     | MD     | OH     | 200                           | 92.55                  | 200                                                 | 94.665                 |
| MA     | OL     | MB     | 600                           | 96.24                  | 600                                                 | 95.494                 | OK     | MD     | o      | 200                           | 87.16                  | 200                                                 | 86.348                 |
| MA     | OL     | MC     | 600                           | 99.69                  | 600                                                 | 102.534                | OK     | MD     | OG     | 150                           | 90.37                  | 150                                                 | 91.781                 |
| MB     | OL     | MC     | 600                           | 96.31                  | 600                                                 | 96.661                 | OK     | MD     | OH     | 150                           | 170.12                 | 150                                                 | 169.483                |
| MB     | OM     | MC     | 600                           | 95.71                  | 600                                                 | 96.968                 | OK     | MD     | OJ     | 150                           | 81.32                  | 150                                                 | 80.804                 |
| MB     | OM     | MD     | 600                           | 95.11                  | 600                                                 | 95.252                 | OK     | MD     | OM     | 200                           | 82.02                  | 200                                                 | 81.289                 |
| MC     | OM     | MD     | 600                           | 98.46                  | 600                                                 | 102.656                | OM     | MD     | o      | 200                           | 86.81                  | 200                                                 | 85.926                 |
| OE     | MA     | o      | 200                           | 97.78                  | 200                                                 | 96.185                 | OM     | MD     | OG     | 150                           | 169.81                 | 150                                                 | 170.637                |
| OF     | MA     | o      | 200                           | 97.80                  | 200                                                 | 96.316                 | OM     | MD     | OH     | 150                           | 91.32                  | 150                                                 | 90.281                 |
| OE     | MA     | OF     | 200                           | 95.36                  | 200                                                 | 95.998                 | OM     | MD     | OJ     | 150                           | 82.25                  | 150                                                 | 85.427                 |
| OJ     | MA     | o      | 200                           | 163.36                 | 200                                                 | 165.622                | MC     | OD     | VB     | 200                           | 120.41                 | 200                                                 | 120.013                |
| OJ     | MA     | OE     | 200                           | 93.25                  | 200                                                 | 94.241                 | MA     | OE     | VB     | 200                           | 119.83                 | 200                                                 | 119.946                |
| OJ     | MA     | OF     | 200                           | 92.49                  | 200                                                 | 90.247                 | MA     | OF     | VC     | 200                           | 120.31                 | 200                                                 | 115.819                |
| OK     | MA     | o      | 200                           | 86.75                  | 200                                                 | 87.049                 | MD     | OG     | VC     | 200                           | 120.84                 | 200                                                 | 116.271                |
| OK     | MA     | OE     | 150                           | 169.44                 | 150                                                 | 169.752                | MD     | OH     | VB     | 200                           | 120.44                 | 200                                                 | 120.093                |
| OK     | MA     | OF     | 150                           | 91.28                  | 150                                                 | 91.590                 | MC     | OI     | VB     | 200                           | 120.06                 | 200                                                 | 119.743                |
| OK     | MA     | OJ     | 150                           | 80.85                  | 150                                                 | 81.503                 | VA     | OB     | VB     | 50                            | 140.35                 | 50                                                  | 140.396                |
| OK     | MA     | OL     | 200                           | 80.91                  | 200                                                 | 81.657                 | VA     | OR     | VC     | 50                            | 140.35                 | 50                                                  | 136.211                |
| OL     | MA     | o      | 200                           | 87.07                  | 200                                                 | 86.089                 | OA     | VA     | OB     | 100                           | 106.56                 | 100                                                 | 105.619                |
| OL     | MA     | OE     | 150                           | 91.65                  | 150                                                 | 90.387                 | OB     | VA     | OB     | 90                            | 111.83                 | 90                                                  | 111.697                |
| OL     | MA     | OF     | 150                           | 169.32                 | 150                                                 | 170.907                | OA     | VA     | OR     | 100                           | 106.56                 | 100                                                 | 106.089                |
| OL     | MA     | OJ     | 150                           | 81.09                  | 150                                                 | 86.081                 | OB     | VA     | OR     | 90                            | 111.83                 | 90                                                  | 113.054                |
| OK     | MB     | OL     | 600                           | 85.43                  | 600                                                 | 86.718                 | OB     | VB     | OC     | 100                           | 109.82                 | 100                                                 | 108.818                |
| OK     | MB     | OM     | 600                           | 86.51                  | 600                                                 | 86.858                 | OB     | VB     | OD     | 90                            | 111.21                 | 90                                                  | 110.370                |
| OK     | MB     | ON     | 200                           | 88.28                  | 200                                                 | 87.183                 | OB     | VB     | OE     | 90                            | 109.75                 | 90                                                  | 109.033                |
| OK     | MB     | OO     | 200                           | 169.43                 | 200                                                 | 173.967                | OR     | VC     | OF     | 90                            | 110.35                 | 90                                                  | 113.060                |
| OK     | MB     | OP     | 200                           | 88.38                  | 200                                                 | 87.174                 | OR     | VC     | OG     | 90                            | 111.03                 | 90                                                  | 112.120                |
| OL     | MB     | OM     | 600                           | 85.89                  | 600                                                 | 85.911                 | OB     | VB     | OH     | 90                            | 111.16                 | 90                                                  | 108.791                |
| OL     | MB     | ON     | 200                           | 170.27                 | 200                                                 | 170.477                | OB     | VB     | OI     | 90                            | 110.30                 | 90                                                  | 110.946                |
| OL     | MB     | OO     | 200                           | 87.47                  | 200                                                 | 92.218                 | OC     | VB     | OD     | 100                           | 109.28                 | 100                                                 | 109.052                |
| OL     | MB     | OP     | 200                           | 87.70                  | 200                                                 | 88.419                 | OC     | VB     | OE     | 100                           | 109.31                 | 100                                                 | 109.020                |
| OM     | MB     | ON     | 200                           | 88.50                  | 200                                                 | 89.328                 | OQ     | VC     | OF     | 100                           | 109.07                 | 100                                                 | 107.082                |
| OM     | MB     | OO     | 200                           | 87.66                  | 200                                                 | 92.683                 | OQ     | VC     | OG     | 100                           | 109.50                 | 100                                                 | 107.537                |
| OM     | MB     | OP     | 200                           | 170.35                 | 200                                                 | 170.127                | OC     | VB     | OH     | 100                           | 109.50                 | 100                                                 | 108.489                |
| ON     | MB     | OO     | 150                           | 98.25                  | 150                                                 | 93.75                  | OC     | VB     | OI     | 100                           | 109.24                 | 100                                                 | 108.884                |
| ON     | MB     | OP     | 150                           | 97.31                  | 150                                                 | 95.617                 | OD     | VB     | OE     | 90                            | 106.75                 | 90                                                  | 109.702                |
| OO     | MB     | OP     | 150                           | 96.58                  | 150                                                 | 93.129                 | OF     | VC     | OG     | 90                            | 106.30                 | 90                                                  | 108.898                |
| OD     | MC     | o      | 200                           | 97.85                  | 200                                                 | 103.646                | OH     | VB     | OI     | 90                            | 105.50                 | 90                                                  | 109.820                |
| OI     | MC     | o      | 200                           | 97.47                  | 200                                                 | 105.641                | OQ     | VC     | OR     | 100                           | 109.82                 | 100                                                 | 106.999                |
| OD     | MC     | OI     | 200                           | 95.26                  | 200                                                 | 95.922                 | MA     | o      | c      | 250                           | 125.28                 | 250                                                 | 124.000                |
| OJ     | MC     | o      | 200                           | 163.39                 | 200                                                 | 153.838                | MC     | o      | c      | 250                           | 125.24                 | 250                                                 | 124.487                |
| OJ     | MC     | OD     | 200                           | 92.89                  | 200                                                 | 91.403                 | MD     | o      | c      | 250                           | 124.73                 | 250                                                 | 125.231                |
| OJ     | MC     | OI     | 200                           | 92.80                  | 200                                                 | 92.362                 | MB     | ON     | c      | 250                           | 123.47                 | 250                                                 | 123.352                |
| OL     | MC     | o      | 200                           | 86.76                  | 200                                                 | 83.547                 | MB     | OO     | c      | 250                           | 123.74                 | 250                                                 | 124.725                |
| OL     | MC     | OD     | 150                           | 92.05                  | 150                                                 | 91.693                 | MB     | OP     | c      | 250                           | 123.93                 | 250                                                 | 123.152                |
| OL     | MC     | OI     | 150                           | 169.26                 | 150                                                 | 164.914                | c3     | c      | o      | 84                            | 116.82                 | 84                                                  | 117.676                |
| OL     | MC     | OJ     | 150                           | 81.37                  | 150                                                 | 75.711                 | c3     | c      | ON     | 84                            | 117.10                 | 84                                                  | 116.891                |
| OL     | MC     | OM     | 200                           | 81.17                  | 200                                                 | 78.462                 | c3     | c      | OO     | 84                            | 117.38                 | 84                                                  | 115.301                |
| OM     | MC     | o      | 200                           | 86.28                  | 200                                                 | 85.324                 | c3     | c      | OP     | 84                            | 117.13                 | 84                                                  | 116.724                |
| OM     | MC     | OD     | 150                           | 170.61                 | 150                                                 | 164.813                | OP     | c      | o      | 118                           | 125.64                 | 118                                                 | 126.108                |
| OM     | MC     | OI     | 150                           | 90.94                  | 150                                                 | 91.545                 | ON     | c      | o      | 118                           | 125.28                 | 118                                                 | 125.941                |
| OM     | MC     | OJ     | 150                           | 81.66                  | 150                                                 | 76.501                 | OO     | c      | o      | 118                           | 125.50                 | 118                                                 | 125.008                |

### S1.3 Dihedral parameters

The energy is given according to this equation:

$$E_{\text{dihedrals}} = \sum_i^{n_{\text{dihedrals}}} V_i (1 + \cos(n_i \phi_i - \gamma_i)) \quad (3)$$

with  $V_i$  (half the torsion barrier) in kcal mol<sup>-1</sup>,  $n_i$  the periodicity, and  $\gamma_i$  the phase in degrees. Tables S3, S4, S5, S6, and S7 lists all of these parameters, based on the definition of the atom types in Figure 1 in the main text.

The parameters in these tables were adapted from References [1] and [2].

**Table S3:** List of all obtained parameters for dihedrals. Parameters  $V_i$  are in kcal mol<sup>-1</sup>,  $\gamma_i$  is in degrees, and  $n_i$  is unitless.

| Atom 1 | Atom 2 | Atom 3 | Atom 4 | - [Mn <sub>4</sub> <sup>IV</sup> ] - |            |       | - [Mn <sup>III</sup> Mn <sub>3</sub> <sup>IV</sup> ] - |            |       |
|--------|--------|--------|--------|--------------------------------------|------------|-------|--------------------------------------------------------|------------|-------|
|        |        |        |        | $V_i$                                | $\gamma_i$ | $n_i$ | $V_i$                                                  | $\gamma_i$ | $n_i$ |
| MA     | OJ     | MC     | OL     | 0.00                                 | 93.24      | 1     | 3.00                                                   | 8.03       | 1     |
| MA     | OJ     | MC     | OM     | 0.00                                 | 93.24      | 1     | 3.00                                                   | 8.03       | 1     |
| MA     | OJ     | MD     | OK     | 0.00                                 | 93.24      | 1     | 3.00                                                   | 93.24      | 1     |
| MA     | OJ     | MD     | OM     | 0.00                                 | 93.24      | 1     | 3.00                                                   | 8.03       | 1     |
| MA     | OK     | MB     | OL     | 0.00                                 | 93.05      | 1     | 3.00                                                   | 8.03       | 1     |
| MA     | OK     | MB     | OM     | 0.00                                 | 93.05      | 1     | 3.00                                                   | 8.03       | 1     |
| MA     | OK     | MD     | OJ     | 0.00                                 | 8.03       | 1     | 3.00                                                   | 8.03       | 1     |
| MA     | OK     | MD     | OM     | 0.00                                 | 90.72      | 1     | 3.00                                                   | 8.03       | 1     |
| MA     | OL     | MB     | OK     | 0.00                                 | 93.05      | 1     | 3.00                                                   | 8.03       | 1     |
| MA     | OL     | MB     | OM     | 0.00                                 | 93.05      | 1     | 3.00                                                   | 8.03       | 1     |
| MA     | OL     | MC     | OJ     | 0.00                                 | 8.03       | 1     | 3.00                                                   | 8.03       | 1     |
| MA     | OL     | MC     | OM     | 0.00                                 | 90.72      | 1     | 3.00                                                   | 8.03       | 1     |
| MB     | OK     | MA     | OJ     | 0.00                                 | 94.40      | 1     | 3.00                                                   | 94.40      | 1     |
| MB     | OK     | MA     | OL     | 0.00                                 | 5.51       | 1     | 3.00                                                   | 8.03       | 1     |
| MB     | OK     | MD     | OJ     | 0.00                                 | 94.40      | 1     | 3.00                                                   | 94.40      | 1     |
| MB     | OK     | MD     | OM     | 0.00                                 | 5.51       | 1     | 3.00                                                   | 8.03       | 1     |
| MB     | OL     | MA     | OJ     | 0.00                                 | 94.40      | 1     | 3.00                                                   | 8.03       | 1     |
| MB     | OL     | MA     | OK     | 0.00                                 | 5.51       | 1     | 3.00                                                   | 8.03       | 1     |
| MB     | OL     | MC     | OJ     | 0.00                                 | 94.40      | 1     | 3.00                                                   | 8.03       | 1     |
| MB     | OL     | MC     | OM     | 0.00                                 | 5.51       | 1     | 3.00                                                   | 8.03       | 1     |
| MB     | OM     | MC     | OJ     | 0.00                                 | 94.40      | 1     | 3.00                                                   | 8.03       | 1     |
| MB     | OM     | MC     | OL     | 0.00                                 | 5.51       | 1     | 3.00                                                   | 8.03       | 1     |
| MB     | OM     | MD     | OJ     | 0.00                                 | 94.40      | 1     | 3.00                                                   | 8.03       | 1     |
| MB     | OM     | MD     | OK     | 0.00                                 | 5.51       | 1     | 3.00                                                   | 8.03       | 1     |
| MC     | OJ     | MA     | OK     | 0.00                                 | 93.24      | 1     | 3.00                                                   | 93.24      | 1     |
| MC     | OJ     | MA     | OL     | 0.00                                 | 93.24      | 1     | 3.00                                                   | 8.03       | 1     |
| MC     | OJ     | MD     | OK     | 0.00                                 | 93.24      | 1     | 3.00                                                   | 93.24      | 1     |
| MC     | OJ     | MD     | OM     | 0.00                                 | 93.24      | 1     | 3.00                                                   | 8.03       | 1     |
| MC     | OL     | MA     | OJ     | 0.00                                 | 8.03       | 1     | 3.00                                                   | 8.03       | 1     |
| MC     | OL     | MA     | OK     | 0.00                                 | 90.72      | 1     | 3.00                                                   | 8.03       | 1     |
| MC     | OL     | MB     | OK     | 0.00                                 | 93.05      | 1     | 3.00                                                   | 8.03       | 1     |
| MC     | OL     | MB     | OM     | 0.00                                 | 93.05      | 1     | 3.00                                                   | 8.03       | 1     |
| MC     | OM     | MB     | OK     | 0.00                                 | 93.05      | 1     | 3.00                                                   | 8.03       | 1     |
| MC     | OM     | MB     | OL     | 0.00                                 | 93.05      | 1     | 3.00                                                   | 8.03       | 1     |
| MC     | OM     | MD     | OJ     | 0.00                                 | 8.03       | 1     | 3.00                                                   | 8.03       | 1     |
| MC     | OM     | MD     | OK     | 0.00                                 | 90.72      | 1     | 3.00                                                   | 8.03       | 1     |

**Table S4:** Continuation of Table S3.

| Atom 1 | Atom 2 | Atom 3 | Atom 4 | – [Mn <sub>4</sub> <sup>IV</sup> ] – |            |       | – [Mn <sup>III</sup> Mn <sub>3</sub> <sup>IV</sup> ] – |            |       |
|--------|--------|--------|--------|--------------------------------------|------------|-------|--------------------------------------------------------|------------|-------|
|        |        |        |        | $V_i$                                | $\gamma_i$ | $n_i$ | $V_i$                                                  | $\gamma_i$ | $n_i$ |
| MD     | OJ     | MA     | OK     | 0.00                                 | 93.24      | 1     | 3.00                                                   | 93.24      | 1     |
| MD     | OJ     | MA     | OL     | 0.00                                 | 93.24      | 1     | 3.00                                                   | 8.03       | 1     |
| MD     | OJ     | MC     | OL     | 0.00                                 | 93.24      | 1     | 3.00                                                   | 8.03       | 1     |
| MD     | OJ     | MC     | OM     | 0.00                                 | 93.24      | 1     | 3.00                                                   | 8.03       | 1     |
| MD     | OK     | MA     | OJ     | 0.00                                 | 8.03       | 1     | 3.00                                                   | 8.03       | 1     |
| MD     | OK     | MA     | OL     | 0.00                                 | 90.72      | 1     | 3.00                                                   | 8.03       | 1     |
| MD     | OK     | MB     | OL     | 0.00                                 | 93.05      | 1     | 3.00                                                   | 8.03       | 1     |
| MD     | OK     | MB     | OM     | 0.00                                 | 93.05      | 1     | 3.00                                                   | 8.03       | 1     |
| MD     | OM     | MB     | OK     | 0.00                                 | 93.05      | 1     | 3.00                                                   | 8.03       | 1     |
| MD     | OM     | MB     | OL     | 0.00                                 | 93.05      | 1     | 3.00                                                   | 8.03       | 1     |
| MD     | OM     | MC     | OJ     | 0.00                                 | 8.03       | 1     | 3.00                                                   | 8.03       | 1     |
| MD     | OM     | MC     | OL     | 0.00                                 | 90.72      | 1     | 3.00                                                   | 8.03       | 1     |
| MA     | OJ     | MC     | o      | 0.00                                 | 25.90      | 1     | 3.00                                                   | 25.90      | 1     |
| MA     | OJ     | MC     | OD     | 0.00                                 | 75.20      | 1     | 3.00                                                   | 75.20      | 1     |
| MA     | OJ     | MC     | OI     | 0.00                                 | 75.20      | 1     | 3.00                                                   | 75.20      | 1     |
| MA     | OJ     | MD     | o      | 0.00                                 | 25.90      | 1     | 3.00                                                   | 74.40      | 1     |
| MA     | OJ     | MD     | OG     | 0.00                                 | 75.20      | 1     | 3.00                                                   | 8.03       | 1     |
| MA     | OJ     | MD     | OH     | 0.00                                 | 75.20      | 1     | 3.00                                                   | 8.03       | 1     |
| MA     | OK     | MB     | ON     | 0.00                                 | 27.20      | 1     | 3.00                                                   | 72.90      | 1     |
| MA     | OK     | MB     | OO     | 0.00                                 | 27.20      | 1     | 3.00                                                   | 72.90      | 1     |
| MA     | OK     | MB     | OP     | 0.00                                 | 27.20      | 1     | 3.00                                                   | 72.90      | 1     |
| MA     | OK     | MD     | o      | 0.00                                 | 177.23     | 1     | 5.00                                                   | 177.23     | 1     |
| MA     | OK     | MD     | OG     | 0.00                                 | 75.52      | 1     | 3.00                                                   | 8.03       | 1     |
| MA     | OK     | MD     | OH     | 0.00                                 | 75.52      | 1     | 3.00                                                   | 8.03       | 1     |
| MA     | OL     | MB     | ON     | 0.00                                 | 27.20      | 1     | 3.00                                                   | 8.03       | 1     |
| MA     | OL     | MB     | OO     | 0.00                                 | 27.20      | 1     | 3.00                                                   | 8.03       | 1     |
| MA     | OL     | MB     | OP     | 0.00                                 | 27.20      | 1     | 3.00                                                   | 8.03       | 1     |
| MA     | OL     | MC     | o      | 0.00                                 | 177.23     | 1     | 3.00                                                   | 8.03       | 1     |
| MA     | OL     | MC     | OD     | 0.00                                 | 75.52      | 1     | 3.00                                                   | 8.03       | 1     |
| MA     | OL     | MC     | OI     | 0.00                                 | 75.52      | 1     | 3.00                                                   | 8.03       | 1     |
| MB     | OK     | MA     | o      | 0.00                                 | 81.34      | 1     | 3.00                                                   | 81.34      | 1     |
| MB     | OK     | MA     | OE     | 0.00                                 | 105.34     | 1     | 3.00                                                   | 8.03       | 1     |
| MB     | OK     | MA     | OF     | 0.00                                 | 105.34     | 1     | 3.00                                                   | 8.03       | 1     |
| MB     | OK     | MD     | o      | 0.00                                 | 81.34      | 1     | 3.00                                                   | 81.34      | 1     |
| MB     | OK     | MD     | OG     | 0.00                                 | 105.34     | 1     | 3.00                                                   | 8.03       | 1     |
| MB     | OK     | MD     | OH     | 0.00                                 | 105.34     | 1     | 3.00                                                   | 8.03       | 1     |
| MB     | OL     | MA     | o      | 0.00                                 | 81.34      | 1     | 3.00                                                   | 8.03       | 1     |
| MB     | OL     | MA     | OE     | 0.00                                 | 105.34     | 1     | 3.00                                                   | 8.03       | 1     |
| MB     | OL     | MA     | OF     | 0.00                                 | 105.34     | 1     | 3.00                                                   | 8.03       | 1     |
| MB     | OL     | MC     | o      | 0.00                                 | 81.34      | 1     | 3.00                                                   | 8.03       | 1     |
| MB     | OL     | MC     | OD     | 0.00                                 | 105.34     | 1     | 3.00                                                   | 8.03       | 1     |
| MB     | OL     | MC     | OI     | 0.00                                 | 105.34     | 1     | 3.00                                                   | 8.03       | 1     |
| MB     | OM     | MC     | o      | 0.00                                 | 81.34      | 1     | 3.00                                                   | 8.03       | 1     |
| MB     | OM     | MC     | OD     | 0.00                                 | 105.34     | 1     | 3.00                                                   | 8.03       | 1     |
| MB     | OM     | MC     | OI     | 0.00                                 | 105.34     | 1     | 3.00                                                   | 8.03       | 1     |
| MB     | OM     | MD     | o      | 0.00                                 | 81.34      | 1     | 3.00                                                   | 8.03       | 1     |
| MB     | OM     | MD     | OG     | 0.00                                 | 105.34     | 1     | 3.00                                                   | 8.03       | 1     |
| MB     | OM     | MD     | OH     | 0.00                                 | 105.34     | 1     | 3.00                                                   | 8.03       | 1     |

**Table S5:** Continuation #2 of Table S3.

| Atom 1 | Atom 2 | Atom 3 | Atom 4 | – [Mn <sup>IV</sup> <sub>4</sub> ] – |            |       | – [Mn <sup>III</sup> Mn <sup>IV</sup> <sub>3</sub> ] – |            |       |
|--------|--------|--------|--------|--------------------------------------|------------|-------|--------------------------------------------------------|------------|-------|
|        |        |        |        | $V_i$                                | $\gamma_i$ | $n_i$ | $V_i$                                                  | $\gamma_i$ | $n_i$ |
| MC     | OJ     | MA     | o      | 0.00                                 | 25.90      | 1     | 3.00                                                   | 74.40      | 1     |
| MC     | OJ     | MA     | OE     | 0.00                                 | 75.20      | 1     | 3.00                                                   | 8.03       | 1     |
| MC     | OJ     | MA     | OF     | 0.00                                 | 75.20      | 1     | 3.00                                                   | 8.03       | 1     |
| MC     | OJ     | MD     | o      | 0.00                                 | 25.90      | 1     | 3.00                                                   | 74.40      | 1     |
| MC     | OJ     | MD     | OG     | 0.00                                 | 75.20      | 1     | 3.00                                                   | 8.03       | 1     |
| MC     | OJ     | MD     | OH     | 0.00                                 | 75.20      | 1     | 3.00                                                   | 8.03       | 1     |
| MC     | OL     | MA     | o      | 0.00                                 | 177.23     | 1     | 3.00                                                   | 8.03       | 1     |
| MC     | OL     | MA     | OE     | 0.00                                 | 75.52      | 1     | 3.00                                                   | 8.03       | 1     |
| MC     | OL     | MA     | OF     | 0.00                                 | 75.52      | 1     | 3.00                                                   | 8.03       | 1     |
| MC     | OL     | MB     | ON     | 0.00                                 | 27.20      | 1     | 3.00                                                   | 8.03       | 1     |
| MC     | OL     | MB     | OO     | 0.00                                 | 27.20      | 1     | 3.00                                                   | 8.03       | 1     |
| MC     | OL     | MB     | OP     | 0.00                                 | 27.20      | 1     | 3.00                                                   | 8.03       | 1     |
| MC     | OM     | MB     | ON     | 0.00                                 | 27.20      | 1     | 3.00                                                   | 8.03       | 1     |
| MC     | OM     | MB     | OO     | 0.00                                 | 27.20      | 1     | 3.00                                                   | 8.03       | 1     |
| MC     | OM     | MB     | OP     | 0.00                                 | 27.20      | 1     | 3.00                                                   | 8.03       | 1     |
| MC     | OM     | MD     | o      | 0.00                                 | 177.23     | 1     | 3.00                                                   | 8.03       | 1     |
| MC     | OM     | MD     | OG     | 0.00                                 | 75.52      | 1     | 3.00                                                   | 8.03       | 1     |
| MC     | OM     | MD     | OH     | 0.00                                 | 75.52      | 1     | 3.00                                                   | 8.03       | 1     |
| MD     | OJ     | MA     | o      | 0.00                                 | 25.90      | 1     | 3.00                                                   | 74.40      | 1     |
| MD     | OJ     | MA     | OE     | 0.00                                 | 75.20      | 1     | 3.00                                                   | 8.03       | 1     |
| MD     | OJ     | MA     | OF     | 0.00                                 | 75.20      | 1     | 3.00                                                   | 8.03       | 1     |
| MD     | OJ     | MC     | o      | 0.00                                 | 25.90      | 1     | 3.00                                                   | 25.90      | 1     |
| MD     | OJ     | MC     | OD     | 0.00                                 | 75.20      | 1     | 3.00                                                   | 75.20      | 1     |
| MD     | OJ     | MC     | OI     | 0.00                                 | 75.20      | 1     | 3.00                                                   | 75.20      | 1     |
| MD     | OK     | MA     | o      | 0.00                                 | 177.23     | 1     | 5.00                                                   | 177.23     | 1     |
| MD     | OK     | MA     | OE     | 0.00                                 | 75.52      | 1     | 3.00                                                   | 8.03       | 1     |
| MD     | OK     | MA     | OF     | 0.00                                 | 75.52      | 1     | 3.00                                                   | 8.03       | 1     |
| MD     | OK     | MB     | ON     | 0.00                                 | 27.20      | 1     | 3.00                                                   | 72.90      | 1     |
| MD     | OK     | MB     | OO     | 0.00                                 | 27.20      | 1     | 3.00                                                   | 72.90      | 1     |
| MD     | OK     | MB     | OP     | 0.00                                 | 27.20      | 1     | 3.00                                                   | 72.90      | 1     |
| MD     | OM     | MB     | ON     | 0.00                                 | 27.20      | 1     | 3.00                                                   | 8.03       | 1     |
| MD     | OM     | MB     | OO     | 0.00                                 | 27.20      | 1     | 3.00                                                   | 8.03       | 1     |
| MD     | OM     | MB     | OP     | 0.00                                 | 27.20      | 1     | 3.00                                                   | 8.03       | 1     |
| MD     | OM     | MC     | o      | 0.00                                 | 177.23     | 1     | 3.00                                                   | 8.03       | 1     |
| MD     | OM     | MC     | OD     | 0.00                                 | 75.52      | 1     | 3.00                                                   | 8.03       | 1     |
| MD     | OM     | MC     | OI     | 0.00                                 | 75.52      | 1     | 3.00                                                   | 8.03       | 1     |
| MA     | OE     | VB     | OB     | 0.00                                 | 76.60      | 2     | 3.00                                                   | 8.03       | 1     |
| MA     | OE     | VB     | OC     | 0.00                                 | 163.04     | 1     | 3.00                                                   | 8.03       | 1     |
| MA     | OE     | VB     | OD     | 0.00                                 | 45.53      | 1     | 3.00                                                   | 8.03       | 1     |
| MA     | OF     | VC     | OG     | 0.00                                 | 45.53      | 1     | 3.00                                                   | 8.03       | 1     |
| MA     | OF     | VC     | OQ     | 0.00                                 | 163.04     | 1     | 3.00                                                   | 8.03       | 1     |
| MA     | OF     | VC     | OR     | 0.00                                 | 76.60      | 2     | 3.00                                                   | 8.03       | 1     |
| MC     | OD     | VB     | OB     | 0.00                                 | 76.60      | 2     | 3.00                                                   | 76.15      | 1     |
| MC     | OD     | VB     | OC     | 0.00                                 | 163.04     | 1     | 3.00                                                   | 163.04     | 1     |
| MC     | OD     | VB     | OE     | 0.00                                 | 45.53      | 1     | 3.00                                                   | 8.03       | 1     |
| MC     | OI     | VB     | OB     | 0.00                                 | 76.60      | 2     | 3.00                                                   | 76.15      | 1     |
| MC     | OI     | VB     | OC     | 0.00                                 | 163.04     | 1     | 3.00                                                   | 163.04     | 1     |
| MC     | OI     | VB     | OH     | 0.00                                 | 45.53      | 1     | 3.00                                                   | 8.03       | 1     |
| MD     | OG     | VC     | OF     | 0.00                                 | 45.53      | 1     | 3.00                                                   | 8.03       | 1     |
| MD     | OG     | VC     | OQ     | 0.00                                 | 163.04     | 1     | 3.00                                                   | 8.03       | 1     |
| MD     | OG     | VC     | OR     | 0.00                                 | 76.60      | 2     | 3.00                                                   | 8.03       | 1     |
| MD     | OH     | VB     | OB     | 0.00                                 | 76.60      | 2     | 3.00                                                   | 8.03       | 1     |
| MD     | OH     | VB     | OC     | 0.00                                 | 163.04     | 1     | 3.00                                                   | 8.03       | 1     |
| MD     | OH     | VB     | OI     | 0.00                                 | 45.53      | 1     | 3.00                                                   | 8.03       | 1     |

**Table S6:** Continuation #3 of Table S3.

| Atom 1 | Atom 2 | Atom 3 | Atom 4 | – [Mn <sup>IV</sup> <sub>4</sub> ] – |            |       | – [Mn <sup>III</sup> Mn <sup>IV</sup> <sub>3</sub> ] – |            |       |
|--------|--------|--------|--------|--------------------------------------|------------|-------|--------------------------------------------------------|------------|-------|
|        |        |        |        | $V_i$                                | $\gamma_i$ | $n_i$ | $V_i$                                                  | $\gamma_i$ | $n_i$ |
| VB     | OE     | MA     | o      | 0.00                                 | 152.37     | 1     | 3.00                                                   | 8.03       | 1     |
| VB     | OE     | MA     | OF     | 0.00                                 | 110.21     | 1     | 3.00                                                   | 8.03       | 1     |
| VB     | OE     | MA     | OJ     | 0.00                                 | 16.09      | 1     | 3.00                                                   | 8.03       | 1     |
| VB     | OE     | MA     | OK     | 0.00                                 | 54.10      | 1     | 3.00                                                   | 8.03       | 1     |
| VB     | OE     | MA     | OL     | 0.00                                 | 54.10      | 1     | 3.00                                                   | 8.03       | 1     |
| VC     | OF     | MA     | o      | 0.00                                 | 152.37     | 1     | 3.00                                                   | 8.03       | 1     |
| VC     | OF     | MA     | OE     | 0.00                                 | 110.21     | 1     | 3.00                                                   | 8.03       | 1     |
| VC     | OF     | MA     | OJ     | 0.00                                 | 16.09      | 1     | 3.00                                                   | 8.03       | 1     |
| VC     | OF     | MA     | OK     | 0.00                                 | 54.10      | 1     | 3.00                                                   | 8.03       | 1     |
| VC     | OF     | MA     | OL     | 0.00                                 | 54.10      | 1     | 3.00                                                   | 8.03       | 1     |
| VB     | OD     | MC     | o      | 0.00                                 | 152.37     | 1     | 3.00                                                   | 152.37     | 1     |
| VB     | OD     | MC     | OI     | 0.00                                 | 110.21     | 1     | 3.00                                                   | 110.50     | 1     |
| VB     | OD     | MC     | OJ     | 0.00                                 | 16.09      | 1     | 3.00                                                   | 16.09      | 1     |
| VB     | OD     | MC     | OL     | 0.00                                 | 54.10      | 1     | 3.00                                                   | 8.03       | 1     |
| VB     | OD     | MC     | OM     | 0.00                                 | 54.10      | 1     | 3.00                                                   | 8.03       | 1     |
| VB     | OI     | MC     | o      | 0.00                                 | 152.37     | 1     | 3.00                                                   | 152.37     | 1     |
| VB     | OI     | MC     | OD     | 0.00                                 | 110.21     | 1     | 3.00                                                   | 110.50     | 1     |
| VB     | OI     | MC     | OJ     | 0.00                                 | 16.09      | 1     | 3.00                                                   | 16.09      | 1     |
| VB     | OI     | MC     | OL     | 0.00                                 | 54.10      | 1     | 3.00                                                   | 8.03       | 1     |
| VB     | OI     | MC     | OM     | 0.00                                 | 54.10      | 1     | 3.00                                                   | 8.03       | 1     |
| VB     | OH     | MD     | o      | 0.00                                 | 152.37     | 1     | 3.00                                                   | 8.03       | 1     |
| VB     | OH     | MD     | OG     | 0.00                                 | 110.21     | 1     | 3.00                                                   | 8.03       | 1     |
| VB     | OH     | MD     | OJ     | 0.00                                 | 16.09      | 1     | 3.00                                                   | 8.03       | 1     |
| VB     | OH     | MD     | OK     | 0.00                                 | 54.10      | 1     | 3.00                                                   | 8.03       | 1     |
| VB     | OH     | MD     | OM     | 0.00                                 | 54.10      | 1     | 3.00                                                   | 8.03       | 1     |
| VC     | OG     | MD     | o      | 0.00                                 | 152.37     | 1     | 3.00                                                   | 8.03       | 1     |
| VC     | OG     | MD     | OH     | 0.00                                 | 110.21     | 1     | 3.00                                                   | 8.03       | 1     |
| VC     | OG     | MD     | OJ     | 0.00                                 | 16.09      | 1     | 3.00                                                   | 8.03       | 1     |
| VC     | OG     | MD     | OK     | 0.00                                 | 54.10      | 1     | 3.00                                                   | 8.03       | 1     |
| VC     | OG     | MD     | OM     | 0.00                                 | 54.10      | 1     | 3.00                                                   | 8.03       | 1     |
| VA     | OB     | VB     | OC     | 0.00                                 | 180.00     | 1     | 1.25                                                   | 172.80     | 3     |
| VA     | OB     | VB     | OD     | 0.00                                 | 60.00      | 2     | 0.25                                                   | 59.75      | 3     |
| VA     | OB     | VB     | OE     | 0.00                                 | 60.00      | 2     | 3.00                                                   | 8.03       | 1     |
| VA     | OB     | VB     | OH     | 0.00                                 | 60.00      | 2     | 3.00                                                   | 8.03       | 1     |
| VA     | OB     | VB     | OI     | 0.00                                 | 60.00      | 2     | 0.25                                                   | 59.75      | 3     |
| VA     | OR     | VC     | OF     | 0.00                                 | 60.00      | 2     | 3.00                                                   | 8.03       | 1     |
| VA     | OR     | VC     | OG     | 0.00                                 | 60.00      | 2     | 3.00                                                   | 8.03       | 1     |
| VA     | OR     | VC     | OQ     | 0.00                                 | 180.00     | 1     | 3.00                                                   | 8.03       | 1     |
| VB     | OB     | VA     | OA     | 0.00                                 | 180.00     | 1     | 0.25                                                   | 172.91     | 3     |
| VB     | OB     | VA     | OB     | 0.00                                 | 62.60      | 2     | 0.25                                                   | 63.58      | 3     |
| VB     | OB     | VA     | OR     | 0.00                                 | 62.60      | 2     | 3.00                                                   | 8.03       | 1     |
| VC     | OR     | VA     | OA     | 0.00                                 | 180.00     | 1     | 3.00                                                   | 8.03       | 1     |
| VC     | OR     | VA     | OB     | 0.00                                 | 62.60      | 2     | 3.00                                                   | 8.03       | 1     |



**Table S7:** Continuation #4 of Table S3.

| Atom 1 | Atom 2 | Atom 3 | Atom 4 | – [Mn <sup>IV</sup> <sub>4</sub> ] – |            |       | – [Mn <sup>III</sup> Mn <sup>IV</sup> <sub>3</sub> ] – |            |       |
|--------|--------|--------|--------|--------------------------------------|------------|-------|--------------------------------------------------------|------------|-------|
|        |        |        |        | $V_i$                                | $\gamma_i$ | $n_i$ | $V_i$                                                  | $\gamma_i$ | $n_i$ |
| c      | o      | MA     | OE     | 0.00                                 | 10.95      | 1     | 3.00                                                   | 8.03       | 1     |
| c      | o      | MA     | OF     | 0.00                                 | 40.90      | 1     | 3.00                                                   | 8.03       | 1     |
| c      | o      | MA     | OJ     | 0.00                                 | 10.95      | 1     | 1.50                                                   | 10.95      | 1     |
| c      | o      | MA     | OK     | 0.00                                 | 40.90      | 1     | 1.50                                                   | 40.90      | 1     |
| c      | o      | MA     | OL     | 0.00                                 | 40.90      | 1     | 3.00                                                   | 8.03       | 1     |
| c      | o      | MC     | OD     | 0.00                                 | 131.90     | 1     | 1.50                                                   | 131.90     | 1     |
| c      | o      | MC     | OI     | 0.00                                 | 131.90     | 1     | 1.50                                                   | 131.90     | 1     |
| c      | o      | MC     | OJ     | 0.00                                 | 10.95      | 1     | 1.50                                                   | 10.95      | 1     |
| c      | o      | MC     | OL     | 0.00                                 | 40.90      | 1     | 3.00                                                   | 8.03       | 1     |
| c      | o      | MC     | OM     | 0.00                                 | 40.90      | 1     | 3.00                                                   | 8.03       | 1     |
| c      | o      | MD     | OG     | 0.00                                 | 131.90     | 1     | 3.00                                                   | 8.03       | 1     |
| c      | o      | MD     | OH     | 0.00                                 | 131.90     | 1     | 3.00                                                   | 8.03       | 1     |
| c      | o      | MD     | OJ     | 0.00                                 | 10.95      | 1     | 1.50                                                   | 10.95      | 1     |
| c      | o      | MD     | OK     | 0.00                                 | 40.90      | 1     | 1.50                                                   | 40.90      | 1     |
| c      | o      | MD     | OM     | 0.00                                 | 40.90      | 1     | 3.00                                                   | 8.03       | 1     |
| c      | ON     | MB     | OK     | 0.00                                 | 37.15      | 1     | 1.50                                                   | 37.15      | 1     |
| c      | ON     | MB     | OL     | 0.00                                 | 37.15      | 1     | 3.00                                                   | 8.03       | 1     |
| c      | ON     | MB     | OM     | 0.00                                 | 37.15      | 1     | 3.00                                                   | 8.03       | 1     |
| c      | ON     | MB     | OO     | 0.00                                 | 131.47     | 1     | 1.50                                                   | 131.76     | 1     |
| c      | ON     | MB     | OP     | 0.00                                 | 131.47     | 1     | 1.50                                                   | 131.76     | 1     |
| c      | OO     | MB     | OK     | 0.00                                 | 37.15      | 1     | 1.50                                                   | 37.15      | 1     |
| c      | OO     | MB     | OL     | 0.00                                 | 37.15      | 1     | 3.00                                                   | 8.03       | 1     |
| c      | OO     | MB     | OM     | 0.00                                 | 37.15      | 1     | 3.00                                                   | 8.03       | 1     |
| c      | OO     | MB     | ON     | 0.00                                 | 131.47     | 1     | 1.50                                                   | 131.76     | 1     |
| c      | OO     | MB     | OP     | 0.00                                 | 131.47     | 1     | 1.50                                                   | 131.76     | 1     |
| c      | OP     | MB     | OK     | 0.00                                 | 37.15      | 1     | 1.50                                                   | 37.15      | 1     |
| c      | OP     | MB     | OL     | 0.00                                 | 37.15      | 1     | 3.00                                                   | 8.03       | 1     |
| c      | OP     | MB     | OM     | 0.00                                 | 37.15      | 1     | 3.00                                                   | 8.03       | 1     |
| c      | OP     | MB     | ON     | 0.00                                 | 131.47     | 1     | 1.50                                                   | 131.76     | 1     |
| c      | OP     | MB     | OO     | 0.00                                 | 131.47     | 1     | 1.50                                                   | 131.76     | 1     |
| MA     | o      | c      | c3     | 0.00                                 | 176.11     | 2     | 2.80                                                   | 176.11     | 2     |
| MB     | ON     | c      | c3     | 0.00                                 | 175.11     | 2     | 2.80                                                   | 175.11     | 2     |
| MB     | OO     | c      | c3     | 0.00                                 | 175.11     | 2     | 2.80                                                   | 175.11     | 2     |
| MB     | OP     | c      | c3     | 0.00                                 | 175.11     | 2     | 2.80                                                   | 175.11     | 2     |
| MC     | o      | c      | c3     | 0.00                                 | 176.11     | 2     | 2.80                                                   | 176.11     | 2     |
| MD     | o      | c      | c3     | 0.00                                 | 176.11     | 2     | 2.80                                                   | 176.11     | 2     |
| MB     | ON     | c      | o      | 0.00                                 | 4.89       | 2     | 2.80                                                   | 4.89       | 2     |
| MB     | OO     | c      | o      | 0.00                                 | 4.89       | 2     | 2.80                                                   | 4.89       | 2     |
| MB     | OP     | c      | o      | 0.00                                 | 4.89       | 2     | 2.80                                                   | 4.89       | 2     |
| MD     | o      | c      | ON     | 0.00                                 | 4.09       | 2     | 2.80                                                   | 4.09       | 2     |
| MC     | o      | c      | OO     | 0.00                                 | 4.09       | 2     | 2.80                                                   | 4.09       | 2     |
| MA     | o      | c      | OP     | 0.00                                 | 4.09       | 2     | 2.80                                                   | 4.09       | 2     |
| hc     | c3     | c      | o      | 0.83                                 | 0.00       | 1     | 0.83                                                   | 0.00       | 1     |
| hc     | c3     | c      | ON     | 0.83                                 | 0.00       | 1     | 0.83                                                   | 0.00       | 1     |
| hc     | c3     | c      | OO     | 0.83                                 | 0.00       | 1     | 0.83                                                   | 0.00       | 1     |
| hc     | c3     | c      | OP     | 0.83                                 | 0.00       | 1     | 0.83                                                   | 0.00       | 1     |

## S1.4 Lennard-Jones parameters

The energy is given according to this equation:

$$E_{\text{LJ}} = \sum_{i < j}^{n_{\text{atoms}}} \sqrt{\epsilon_i \epsilon_j} \left[ \left( \frac{r_{i,\text{min}} + r_{j,\text{min}}}{2r_{ij}} \right)^{12} - 2 \left( \frac{r_{i,\text{min}} + r_{j,\text{min}}}{2r_{ij}} \right)^6 \right] \quad (4)$$

where  $\epsilon_i, \epsilon_j$  are in kcal mol<sup>-1</sup> and  $r_{i,\text{min}}, r_{j,\text{min}}$  in Å. Table S8 lists all of these parameters, based on the definition of the atom types in Figure 1 in the main text.

Parameters for Mn, O, C, H, and Na<sup>+</sup> were taken from AMBER [3, 4], whereas the parameters for V were adapted from Reference [1].

**Table S8:** List of all obtained parameters for the Lennard-Jones interaction. Parameters  $\epsilon_i$  are in kcal mol<sup>-1</sup> and  $r_{i,\text{min}}$  in Å.

| Atom 1 | – [Mn <sub>4</sub> <sup>IV</sup> ] / [Mn <sup>III</sup> Mn <sub>3</sub> <sup>IV</sup> ] – |              |
|--------|-------------------------------------------------------------------------------------------|--------------|
|        | $r_{i,\text{min}}$                                                                        | $\epsilon_i$ |
| MA     | 1.4670                                                                                    | 0.0296       |
| MB     | 1.4670                                                                                    | 0.0296       |
| MC     | 1.4670                                                                                    | 0.0296       |
| MD     | 1.4670                                                                                    | 0.0296       |
| OA     | 1.6562                                                                                    | 0.1700       |
| OB     | 1.6562                                                                                    | 0.1700       |
| OC     | 1.6562                                                                                    | 0.1700       |
| OD     | 1.6562                                                                                    | 0.1700       |
| OE     | 1.6562                                                                                    | 0.1700       |
| OF     | 1.6562                                                                                    | 0.1700       |
| OG     | 1.6562                                                                                    | 0.1700       |
| OI     | 1.6562                                                                                    | 0.1700       |
| OJ     | 1.6562                                                                                    | 0.1700       |
| OK     | 1.6562                                                                                    | 0.1700       |
| OL     | 1.6562                                                                                    | 0.1700       |
| OM     | 1.6562                                                                                    | 0.1700       |
| ON     | 1.6562                                                                                    | 0.1700       |
| OO     | 1.6562                                                                                    | 0.1700       |
| OP     | 1.6562                                                                                    | 0.1700       |
| OQ     | 1.6562                                                                                    | 0.1700       |
| OR     | 1.6562                                                                                    | 0.1700       |
| VA     | 1.5720                                                                                    | 0.0160       |
| VB     | 1.5720                                                                                    | 0.0160       |
| VC     | 1.5720                                                                                    | 0.0160       |
| Na+    | 1.3690                                                                                    | 0.0874       |

## S1.5 Coulomb parameters

The energy is given according to this equation:

$$E_{\text{Coulomb}} = \sum_{i < j}^{n_{\text{atoms}}} \frac{q_i q_j}{4\pi\epsilon_0 r_{ij}} \quad (5)$$

with  $q_i, q_j$  are given in multiples of the elementary charge and  $\frac{1}{4\pi\epsilon_0} = 332.05 \text{ \AA kcal mol}^{-1}$ . Table S9 lists all of these parameters, based on the definition of the atom types in Figure 1 in the main text.

The parameters were obtained as the Mulliken charges at the optimized geometry. The BP86 level of theory, the ZORA-def2-TZVP basis set for the description of the Mn, V, O atoms and the ZORA-def2-SVP basis set for the C and H atoms, and Grimme's D3 correction were used.

**Table S9:** List of all obtained parameters for the Coulomb interaction. Parameters  $q_i$  are in multiples of the elementary charge.

| Atom | Atom type | $- [\text{Mn}_4^{\text{IV}}] -$<br>$q_i$ | $- [\text{Mn}^{\text{III}}\text{Mn}_3^{\text{IV}}] -$<br>$q_i$ | Atom | Atom type | $- [\text{Mn}_4^{\text{IV}}] -$<br>$q_i$ | $- [\text{Mn}^{\text{III}}\text{Mn}_3^{\text{IV}}] -$<br>$q_i$ |
|------|-----------|------------------------------------------|----------------------------------------------------------------|------|-----------|------------------------------------------|----------------------------------------------------------------|
| Mn1  | MA        | +0.4116                                  | +0.3703                                                        | C2   | c3        | -0.2136                                  | -0.2049                                                        |
| O1   | OK        | -0.2134                                  | -0.2201                                                        | H1   | hc        | +0.1427                                  | +0.0908                                                        |
| Mn2  | MB        | +0.3238                                  | +0.2972                                                        | H2   | hc        | +0.1471                                  | +0.1030                                                        |
| O2   | OL        | -0.2125                                  | -0.2778                                                        | H3   | hc        | +0.1651                                  | +0.1075                                                        |
| Mn3  | MC        | +0.4105                                  | +0.7052                                                        | C1   | c         | +0.2017                                  | +0.1868                                                        |
| O4   | OM        | -0.2119                                  | -0.2783                                                        | O6   | ON        | -0.2139                                  | -0.2322                                                        |
| Mn4  | MD        | +0.4113                                  | +0.3710                                                        | O5   | o         | -0.1858                                  | -0.1984                                                        |
| O3   | OJ        | -0.3745                                  | -0.3687                                                        | C3   | c3        | -0.2137                                  | -0.2047                                                        |
| O20  | OQ        | -0.4964                                  | -0.5044                                                        | H4   | hc        | +0.1465                                  | +0.0957                                                        |
| V4   | VC        | +1.1642                                  | +1.1032                                                        | H5   | hc        | +0.1433                                  | +0.0923                                                        |
| O21  | OF        | -0.4258                                  | -0.4058                                                        | H6   | hc        | +0.1654                                  | +0.0968                                                        |
| O22  | OG        | -0.4261                                  | -0.4060                                                        | C4   | c         | +0.2011                                  | +0.1823                                                        |
| O23  | OR        | -0.6460                                  | -0.6329                                                        | O8   | OO        | -0.2135                                  | -0.2434                                                        |
| V3   | VA        | +1.2883                                  | +1.2263                                                        | O7   | o         | -0.1857                                  | -0.2885                                                        |
| O17  | OA        | -0.4733                                  | -0.4890                                                        | C5   | c3        | -0.2134                                  | -0.2047                                                        |
| O18  | OB        | -0.6459                                  | -0.6321                                                        | H7   | hc        | +0.1468                                  | +0.1024                                                        |
| V2   | VB        | +1.1633                                  | +1.1259                                                        | H8   | hc        | +0.1429                                  | +0.0923                                                        |
| O14  | OH        | -0.4260                                  | -0.4243                                                        | H9   | hc        | +0.1651                                  | +0.1066                                                        |
| O15  | OI        | -0.4258                                  | -0.5115                                                        | C6   | c         | +0.2018                                  | +0.1875                                                        |
| O16  | OC        | -0.4961                                  | -0.5213                                                        | O9   | o         | -0.1856                                  | -0.1976                                                        |
| O12  | OC        | -0.4965                                  | -0.5213                                                        | O10  | OP        | -0.2140                                  | -0.2337                                                        |
| V1   | VB        | +1.1645                                  | +1.1263                                                        |      |           |                                          |                                                                |
| O11  | OD        | -0.4257                                  | -0.5113                                                        |      |           |                                          |                                                                |
| O13  | OE        | -0.4256                                  | -0.4240                                                        |      |           |                                          |                                                                |
| O19  | OB        | -0.6464                                  | -0.6324                                                        |      |           |                                          |                                                                |

## S2 Deviations of the MM MD from the reference QM/MM MD

In Figure S1 we present the absolute deviations of the bond lengths and angles between the reference QM/MM MD trajectories and the MM MD trajectories with the final force field parameters. As can be seen, deviations were below 2.5 pm for  $[\text{Mn}_4^{\text{IV}}]$  and below 5.3 pm for the more challenging  $[\text{Mn}^{\text{III}}\text{Mn}_3^{\text{IV}}]$ . For the angles, the deviations were below 5.4 degrees ( $[\text{Mn}_4^{\text{IV}}]$ ) and 7.7 degrees ( $[\text{Mn}^{\text{III}}\text{Mn}_3^{\text{IV}}]$ ).

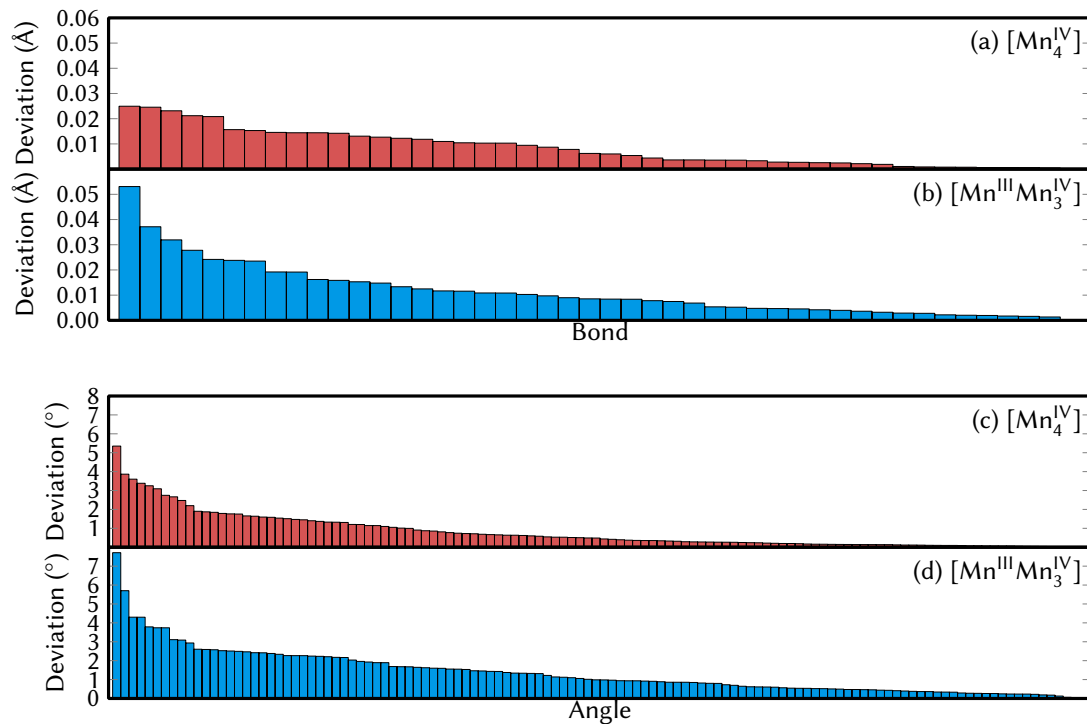

**Figure S1:** Absolute deviations of the bond lengths and angles between the reference QM/MM MD trajectories and the MM MD trajectories with the final force field parameters, sorted by magnitude. The individual bonds and the MM MD or QM/MM MD distributions are shown in Figure 2 in the main manuscript.

### S3 Influence of point charge placement

Here we document the very strong influence of the point charge placement for the single point calculations to obtain the energy gaps. Three different point charge treatment schemes are represented in Figure S2.

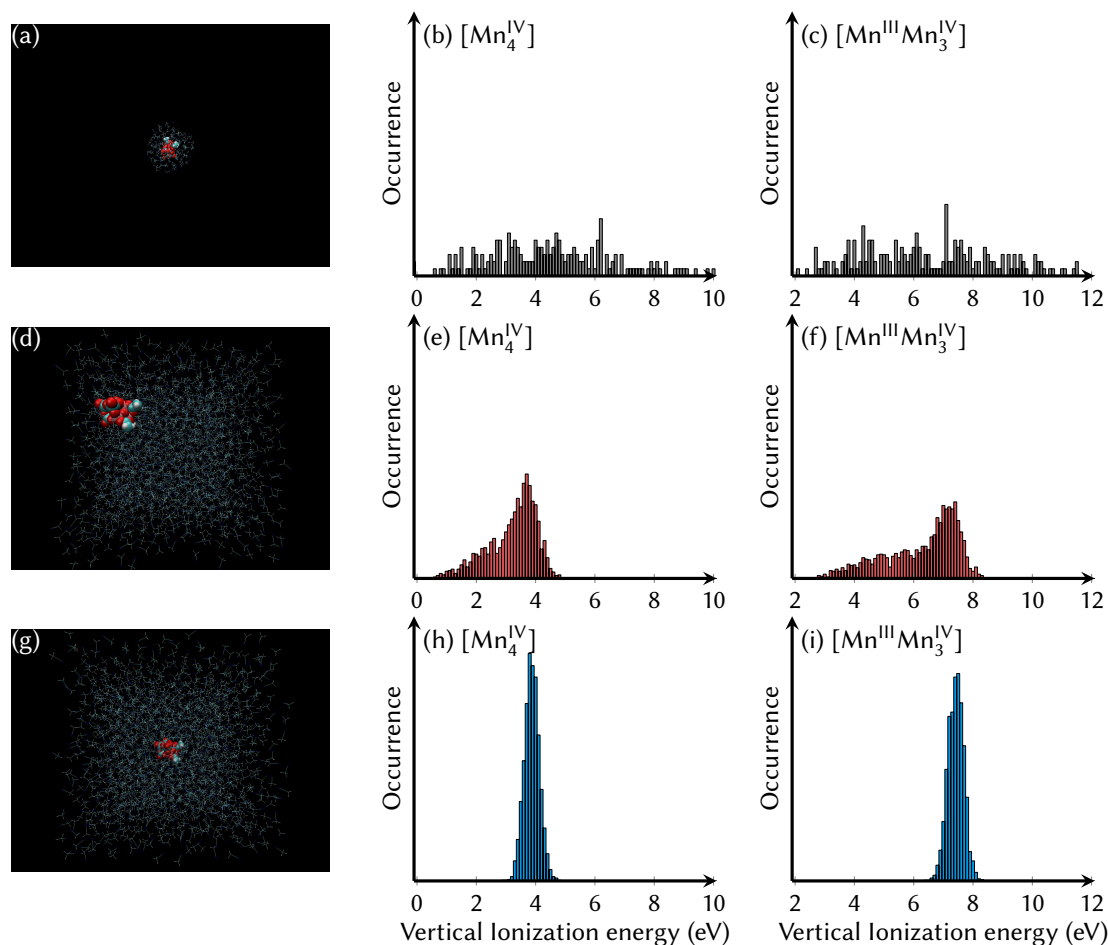

**Figure S2:** Three different point charge treatments and their influence on the obtained energy gap distributions. (a)–(c) Small cut-off for inclusion of MM point charges. (d)–(f) Large cut-off for inclusion. (g)–(i) Large cut-off and reimagining to place the solute in the center of the cell. These calculations were performed with the BP86 level of theory described in the main manuscript.

In the top row of the figure, we show some preliminary calculations where we included only point charges within 10 Å of the solute, using periodic boundary settings and `qmcut=10` in the AMBER input. With these settings, the single point calculations included between 750 and 850 point charges. Notably, the small number of point charges and the variation in the number of point charges leads to large variations in the energy gaps between reduced and oxidized states. Hence, this point charge treatment is not suitable for the computation of redox potentials.

In the middle row of Figure S2, we turned off periodic boundary conditions for the single point calculation and included every point charge in the primary cell through `qmcut=999`. In this way, the number of point charges is consistent (13801 or 13802 point charges depending on oxidation state of the trajectory). These settings provide a more consistent electrostatic environment for the solute and therefore a tighter distribution of the energy gaps. However, the distributions are non-Gaussian and are also not suitable for computation of redox potentials.

In the bottom row we use the same settings as in the middle row (no periodic boundary conditions, `qmcut=999`). However, prior to the single point calculations we also reimaged the primary cell such that the solute is centered and fully surrounded by point charges in a consistent way. These settings produce the desired narrow, nearly Gaussian distribution of energy gaps that can be used to estimate the redox potentials through Marcus theory.

## S4 Solvent shell sampling

As discussed in the main text, there are strong differences between the solvent sampling in the MM MD and QM/MM MD trajectories. In Figures S3 and S4, we compare the solvent distribution.

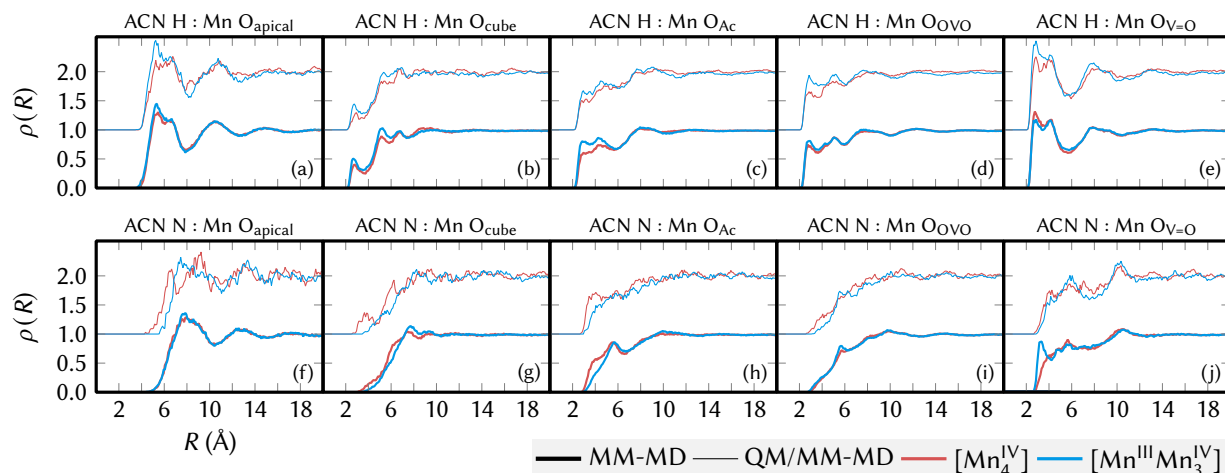

**Figure S3:** Radial distribution functions between the indicated solvent atoms (either H or N) and solute oxygen atoms. The QM/MM curves (thin lines) are shifted by +1 for clarity.

100 ns MM-MD trajectory (2000 snapshots every 50 ps):

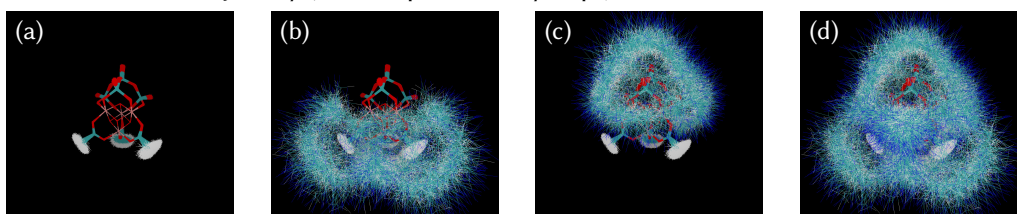

5 ps QM/MM-MD trajectory (200 snapshots every 25 fs):

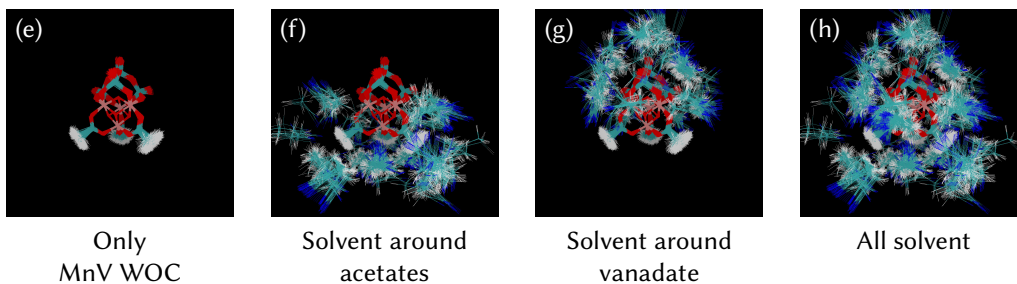

**Figure S4:** Depiction of the sampled solvent shell (all solvent molecules within 3 Å of the solute) around the  $[\text{Mn}^{\text{IV}}]$  complex. Panels (a) to (d) show the sampling for the MM MD trajectory, whereas panels (e) to (h) are for the QM/MM MD trajectory. From left to right, we show the overlay of (a/e) only the solute, (b/f) the solvent close to the acetate ligands, (c/g) the solvent close to the vanadate ligand, and (d/h) the solvent close to any solute atom.

In Figure S3, we show the radial distribution functions between the acetonitrile H and N atoms and groups of solute oxygen atoms. Here, it is observable that the QM/MM MD data are much more noisy than the MM MD data. However, QM/MM and MM agree qualitatively to a large extent. Hence, we estimate that the general description of electrostatic interactions by the FFs through the Mulliken charges is appropriate.

In Figure S4 we show the three-dimensional distribution of solvent molecules. Significant differences between MM MD and QM/MM MD are visible. The QM/MM solvent distribution does not provide a uniform sampling of the first solvation shell. Instead, all solvent coordinates are very similar to the initial coordinates from the equilibration run.

## S5 Effect of different MM and QM/MM potential energy surfaces on the vertical energy gaps

In principle, the potential energy surfaces in the MM MD trajectories used for sampling the phase space are not perfectly parallel to the more accurate QM/MM potential energy surfaces, which could introduce a bias in the sampled vertical energy gaps. In Figure S5, we present scatter plots of the vertical energy gaps over the difference in potential energy between an MM treatment and a QM/MM treatment. Here, for consistency the MM potential energies were recomputed with the same non-periodic settings as the QM/MM energies.

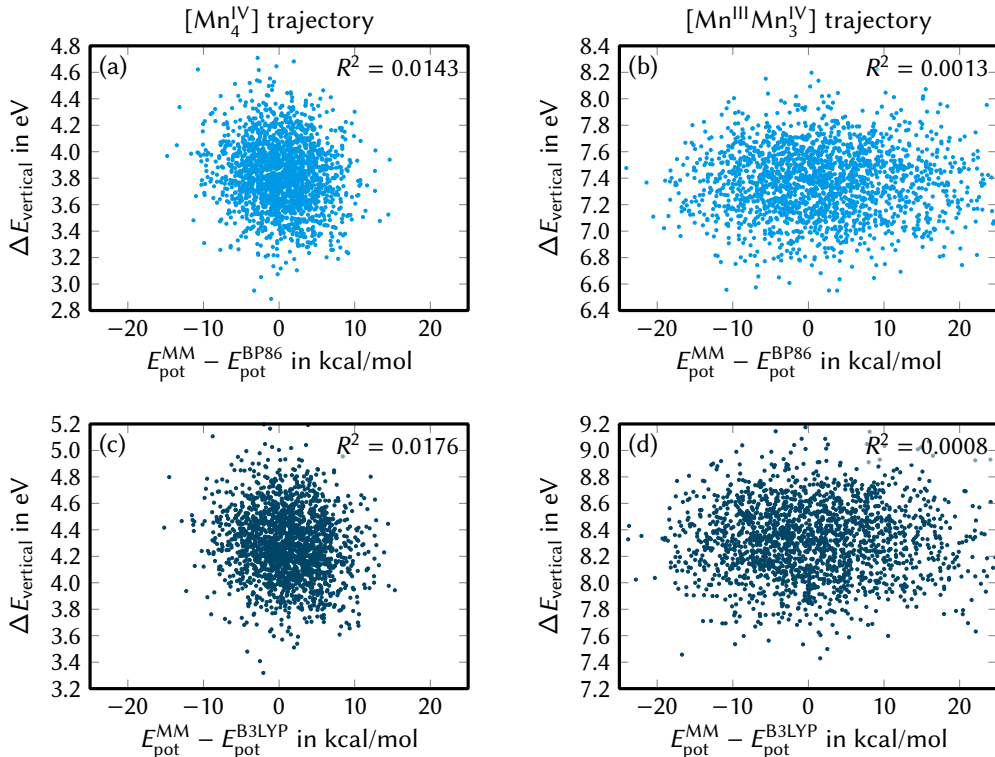

**Figure S5:** Scatter plots showing the dependence of the vertical energy gaps  $\Delta E$  on the difference between MM potential energy and QM/MM potential energy. The top row shows the results at the BP86 level of theory, the bottom row shows the analogous results with B3LYP. The left panels correspond to the  $[\text{Mn}_4^{\text{IV}}]$  trajectory (i.e., the oxidized species) and the right panels to the  $[\text{Mn}^{\text{III}}\text{Mn}_3^{\text{IV}}]$  trajectory (the reduced species), and the potential energy differences always refer to the state used to sample the respective trajectory. The potential energy differences were shifted towards zero, as the absolute MM and QM/MM potential energies are very different (on the order of -70,000 kcal/mol for MM and -6,600,000 kcal/mol for QM/MM). The shown  $R^2$  are squared Pearson correlation coefficients of a linear fit to the data.

The standard deviation of the potential energy differences can be used as a measure for the accuracy of the optimized FFs, see, e.g., Ref. [5, 6]. Here, the  $[\text{Mn}_4^{\text{IV}}]$  FF shows a standard deviation of 4.1 kcal/mol to BP86 and 4.4 kcal/mol to B3LYP. For the more challenging  $[\text{Mn}^{\text{III}}\text{Mn}_3^{\text{IV}}]$  system, these values are 10.1 kcal/mol and 9.9 kcal/mol. Although these standard deviations are non-negligible, they are on the same order of magnitude as the intrinsic errors of the electronic structure methods. This can be seen in the fact that the standard deviation of the BP86–B3LYP energy differences are also about 6 kcal/mol.

Most importantly, the figure shows that there is no dependence of the energy gaps on the potential energy differences. Hence, no bias in the redox potential is introduced by including in the histograms those snapshots that have relatively low MM potential energy but relatively high QM/MM potential energy, and that therefore would not have been sampled by a QM/MM trajectory.

## Supplementary References

- [1] Menke, C.; Diemann, E.; Müller, A. Polyoxovanadate clusters and cages: Force-field parameterization. *J. Mol. Struct.* **1997**, 436-437, 35–47. doi:10.1016/s0022-2860(97)00203-2.
- [2] Manchanda, R.; Zimmer, M.; Brudvig, G.W.; Crabtree, R.H. A modified MM2 force field for high-valent di- $\mu$ -oxo manganese dimers. *J. Mol. Struct.* **1994**, 323, 257–266. doi:10.1016/0022-2860(94)08304-5.
- [3] Joung, I.S.; Cheatham, T.E. Molecular dynamics simulations of the dynamic and energetic properties of alkali and halide ions using water-model-specific ion parameters. *J. Phys. Chem. B* **2009**, 113, 13279–13290. doi:10.1021/jp902584c.
- [4] Li, P.; Roberts, B.P.; Chakravorty, D.K.; Merz, K.M. Rational design of particle mesh Ewald compatible Lennard-Jones parameters for +2 metal cations in explicit solvent. *J. Chem. Theory Comput.* **2013**, 9, 2733–2748. doi:10.1021/ct400146w.
- [5] König, G.; Hudson, P.S.; Boresch, S.; Woodcock, H.L. Multiscale free energy simulations: An efficient method for connecting classical MD simulations to QM or QM/MM free energies using non-Boltzmann Bennett reweighting schemes. *J. Chem. Theory Comput.* **2014**, 10, 1406–1419. doi:10.1021/ct401118k.
- [6] Hudson, P.S.; Woodcock, H.L.; Boresch, S. Use of interaction energies in QM/MM free energy simulations. *J. Chem. Theory Comput.* **2019**, 15, 4632–4645. doi:10.1021/acs.jctc.9b00084.
